# Supplementary material
Source: PubMed Central journal article supplement (PMC5527256)
Supplement: ajtr0009-3422-f6.pdf [file ajtr0009-3422-f6.pdf]

## DPI enhances bacterial phagocytosis in murine macrophages

**Table S1.** Sequences of PCR primers

| Name    | Primer Sequence                    |
|---------|------------------------------------|
| β-actin | F: 5'-GGGAAATCGTGCGTGACATCAAAG-3'  |
|         | R: 5'-CATACCCAAGAAGGAAGGCTGGAA-3'  |
| TNF-α   | F: 5'-CAGGTTCTGTCCCTTCACTCACT-3'   |
|         | R: 5'-GTTCAGTAGACAGAAGAGCGTGGT-3'  |
| IL-6    | F: 5'-TGGAGTACCATAGCTACCTGGAGT-3'  |
|         | R: 5'-TCCT-TAGCCACTCCTTCTGTGACT-3' |

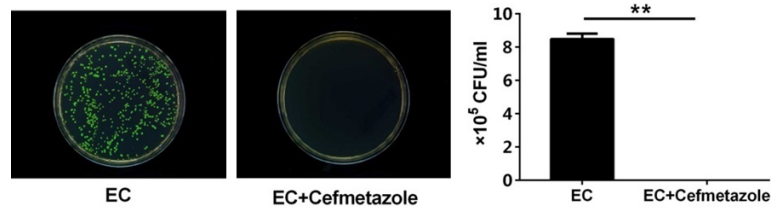

**Figure S1.** Macrophages ( $5 \times 10^5$ /ml) were seeded in 24-wells plates and incubated for 2 hours before infected with *E. coli* (MOI = 1) for 1 hour. Cells were rinsed with PBS or 200  $\mu$ g/ml Cefmetazole sodium was added in and incubated for 30 min, Supernatants were collected and the CFU assay was performed for extracellular bacterial quantification.  $**P < 0.01$ . Data are presented as the mean  $\pm$  standard deviation.  $n = 3$ .

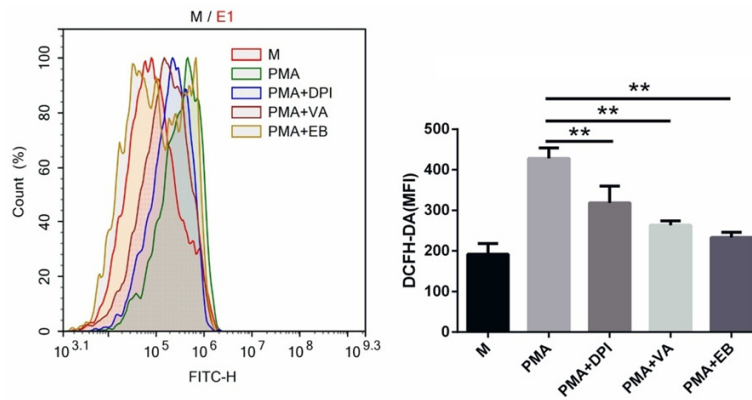

**Figure S2.** Macrophages ( $5 \times 10^5$ /ml) were pretreated with DPI (10  $\mu$ M), VA (10  $\mu$ M) or EB (10  $\mu$ M) for 30 min. Then PMA (50 nM) was added and incubated for 1 h. Intracellular ROS was quantified by DCFH-DA detection via flow cytometry, and expressed as MFI of DCFH-DA.  $**P < 0.01$ . Data are presented as the mean  $\pm$  standard deviation.  $n = 3$ .
